# Supplementary material for: RNA-Seq of Early-Infected Poplar Leaves by the Rust Pathogen Melampsora larici-populina Uncovers PtSultr3;5, a Fungal-Induced Host Sulfate Transporter
Source: PLoS One. 2012 Aug 30;7(8):e44408. doi: 10.1371/journal.pone.0044408 (PMC3431362; doi:10.1371/journal.pone.0044408)
Supplement: Table S2 — List of primers used in this study. (XLS) [file pone.0044408.s012.xls]

## Sheet: OK
Phytozome ID	Annotation
POPTR_0002s01650.1	GST	Forward	CTCGTTCCCATTGACCTCTC
		Reverse	CTGCCCATCAGTTTCTACCC
POPTR_0006s16150.1	Sulfate transporter (PtSulTr3;5)	Forward	GCTTTGTTGAGGGCACTTCT
		Reverse	TCACAGCTTTCCCATTACCC
POPTR_0004s10240.1	Allene oxyde cyclase	Forward	GAGGATTCAAGACCCACCAA
		Reverse	TTTTGGATCAGCACGCATAG
POPTR_0005s08050.1	Inositol-3-phosphate synthase	Forward	ACAAGGTGGACAAGGTGGTT
		Reverse	GTGTTCTGTGGGCTTCCATT
POPTR_0010s16030.1	Pop3 protein	Forward	ATGGCAACCAGAACTCCAA
		Reverse	AGACTCCATGCCCAAATCC
POPTR_0019s07690.1	Bark storage protein/purine phosphorylase	Forward	GGCTGGATTGCCAAGTAAAA
		Reverse	TGTGTGCTGGGAACAAAGAA
POPTR_0014s01940.1	CytB5	Forward	CATTGGACACAGCAAGGAAG
		Reverse	TAATGGCAGGACGAACTCAA
POPTR_0001s09200.1	AMP-binding enzyme/Acyl-CoA synthase	Forward	AACCCGTTACCCGAAGATG
		Reverse	GAACCACCCGAATTGAAAAG
POPTR_0010s22950.1	Aquaporin	Forward	AGCCAGGAAGGTCTCTTTGA
		Reverse	ATGATCTCAGCACCCAATCC
POPTR_0002s19780.1	Universal stress protein	Forward	AAACCCCGTCCAACTATCTACTC
		Reverse	ACATCCTGTGCCTCTCCACT
POPTR_0014s16970.1	Serine protease	Forward	CTGGTGCTGTAGGGATGGTT
		Reverse	CCAATGCGTGTTACTGGTT
POPTR_0006s14400.1	Cysteine protease	Forward	GGCTTTTGGGAAAGGAATCT
		Reverse	AACTTGCAGGCGTCATCTTT
